# Supplementary material
Source: publisher figshare collection journal article supplement (https://acs.figshare.com/ndownloader/files/5840931)

S10:  $^1\text{H}$  NMR of the photooxidation of 2c with DCA

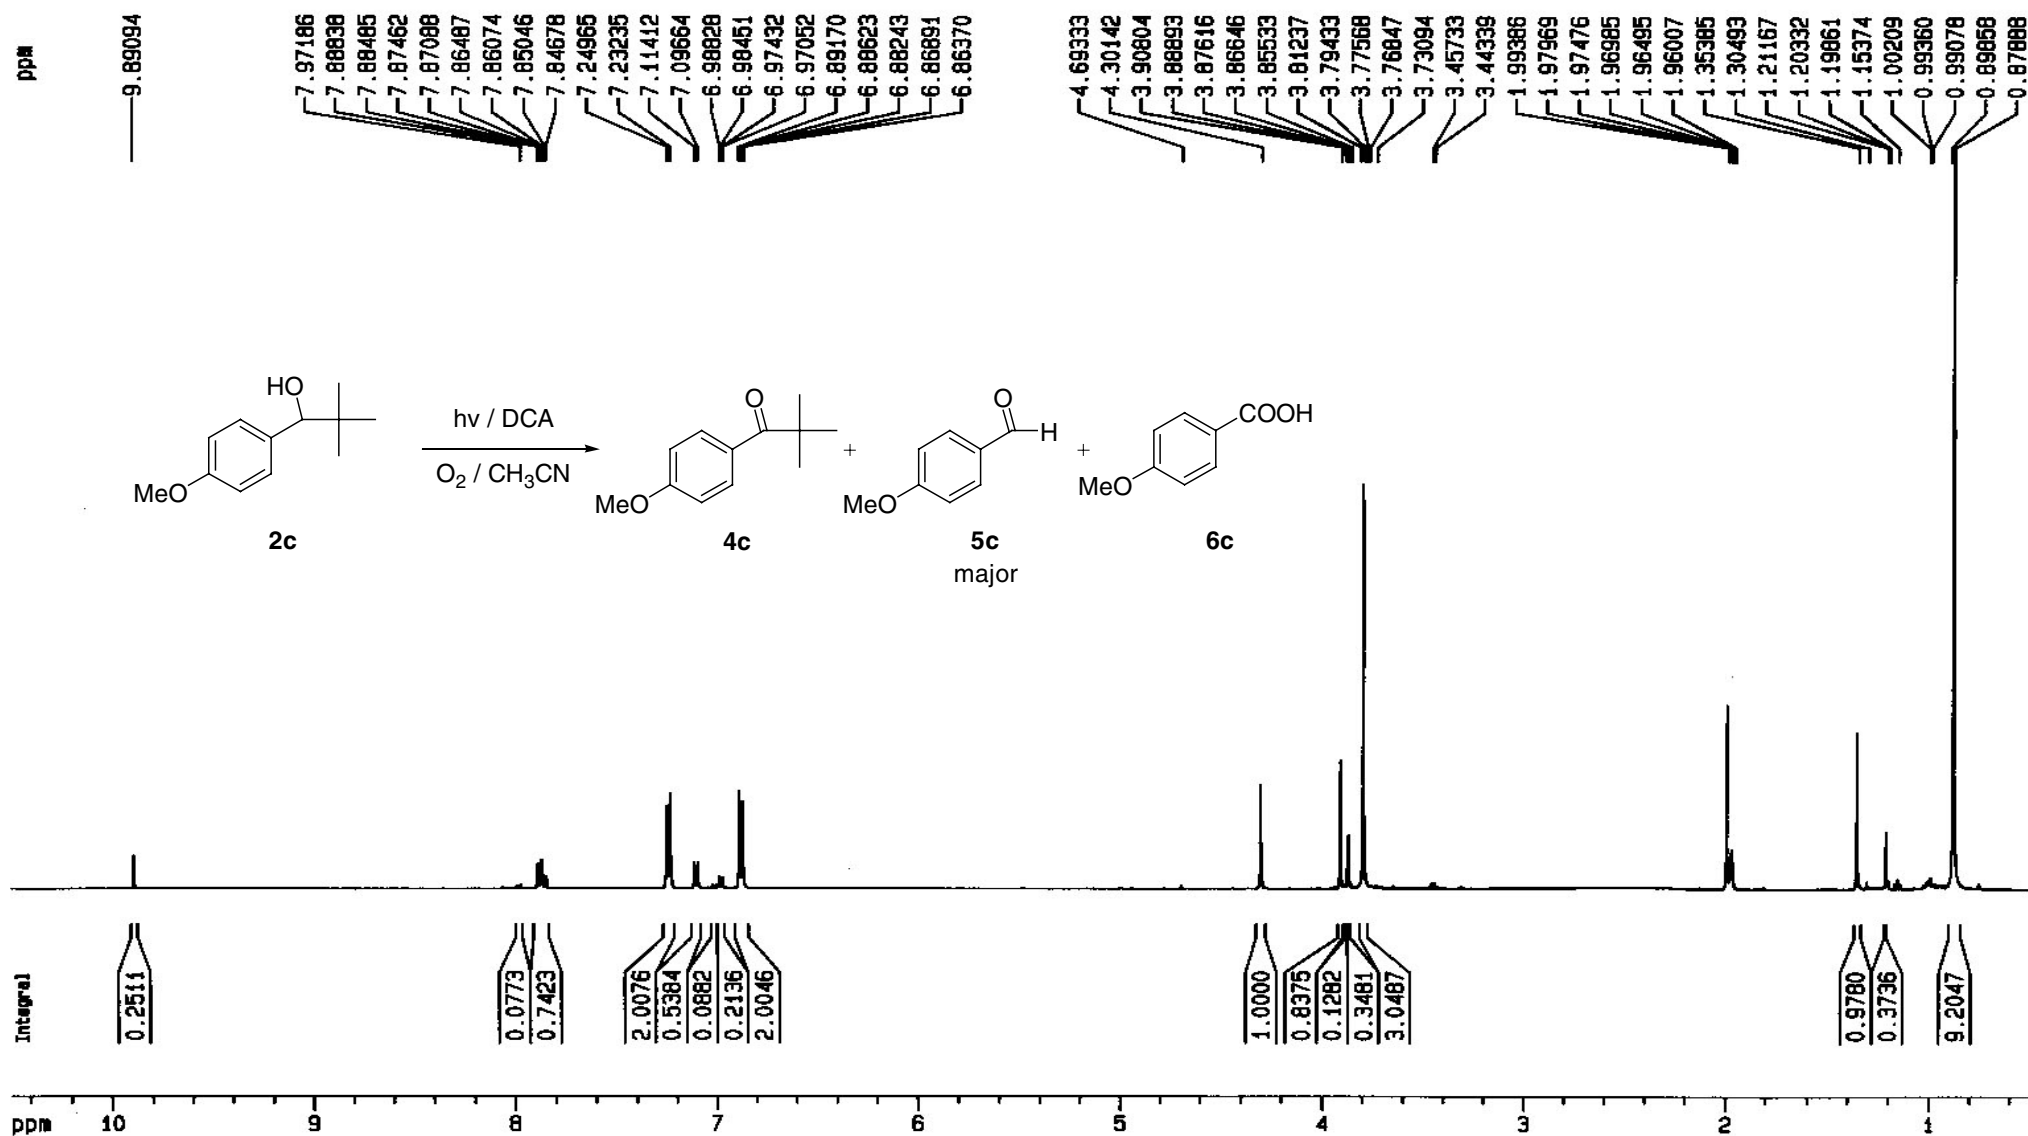

Supplement: Supplementary file 1 [file 5840931]
